# Supplementary material
Source: MDPI journal article supplement (https://www.mdpi.com/2624-845X/3/4/13)
Supplement: s1 [file s1]

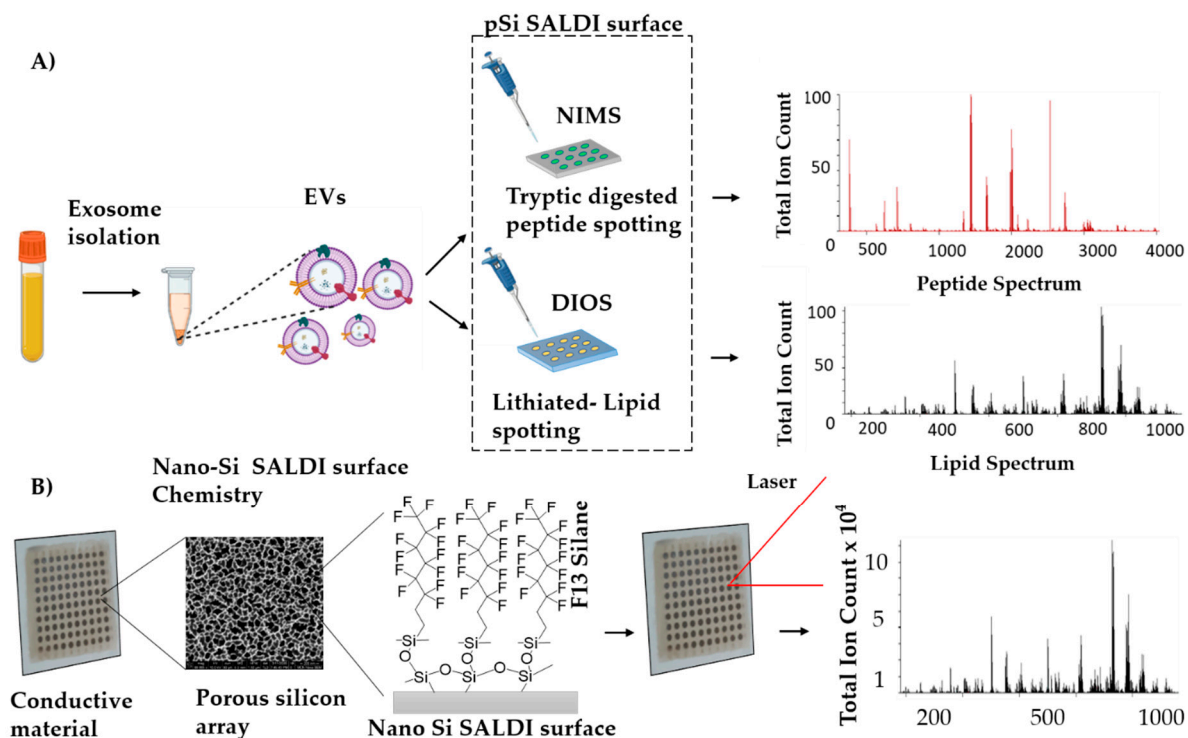

**Figure S1.** Workflow of small extracellular vesicles (EVs) biomarker detection using SALDI-MS for CRC diagnosis. (A) Plasma EVs were isolated from metastatic CRC and CFI individuals. Then trypsin-digestion proteins and lithium adduct lipid samples were spotted on NIMS, and DIOS surfaces, respectively. (B) SALDI surfaces functionalised with a fluorinated silane are then coupled with a high-resolution mass spectrometer. CRC - colorectal cancer stage-I to stage-IV; CFI - cancer free individual and healthy participants; pSi - Porous silicon; NIMS - Nanostructure-initiator mass spectrometry; SALDI - Surface-assisted laser desorption/ionisation mass spectrometry; DIOS - Desorption/ionisation on porous silicon.

**Table S1.** Top 63 peptide ions discriminate CRC and CFI group. CRC - colorectal cancer stage-I to stage-IV; CFI - cancer free individuals and healthy participants.

| <i>m/z</i> | Interval width ( $\pm$ Da) | <i>m/z</i> | Interval width ( $\pm$ Da) | <i>m/z</i> | Interval width ( $\pm$ Da) |
|------------|----------------------------|------------|----------------------------|------------|----------------------------|
| 462.15     | 0.023                      | 572.11     | 0.029                      | 796.15     | 0.04                       |
| 478.14     | 0.024                      | 588.11     | 0.029                      | 838.51     | 0.042                      |
| 480.16     | 0.024                      | 589.11     | 0.03                       | 845.62     | 0.042                      |
| 481.17     | 0.024                      | 590.12     | 0.03                       | 846.63     | 0.042                      |
| 482.18     | 0.024                      | 591.13     | 0.03                       | 855.04     | 0.043                      |
| 500.13     | 0.025                      | 606.09     | 0.03                       | 873.65     | 0.044                      |
| 502.14     | 0.025                      | 628.07     | 0.031                      | 874.66     | 0.044                      |
| 522.13     | 0.026                      | 631.63     | 0.032                      | 901.69     | 0.045                      |
| 522.6      | 0.026                      | 644.04     | 0.032                      | 902.69     | 0.045                      |
| 524.16     | 0.026                      | 666.13     | 0.033                      | 964.91     | 0.048                      |
| 525.14     | 0.026                      | 667.18     | 0.033                      | 965.9      | 0.048                      |
| 526.16     | 0.026                      | 669.19     | 0.034                      | 1425.1     | 0.071                      |
| 544.11     | 0.027                      | 669.21     | 0.034                      | 1452.11    | 0.073                      |
| 547.14     | 0.027                      | 670.11     | 0.034                      | 2002.54    | 0.1                        |
| 550.12     | 0.028                      | 689.17     | 0.035                      | 2003.55    | 0.1                        |
| 550.63     | 0.028                      | 713.2      | 0.036                      | 2691.47    | 0.135                      |
| 551.13     | 0.028                      | 733.14     | 0.037                      | 2691.82    | 0.135                      |
| 551.62     | 0.028                      | 735.18     | 0.037                      | 2691.99    | 0.135                      |
| 568.12     | 0.028                      | 777.14     | 0.039                      | 3408.43    | 0.171                      |
| 569.14     | 0.029                      | 779.18     | 0.039                      | 3582.63    | 0.18                       |
| 570.15     | 0.029                      | 795.14     | 0.04                       | 3644.1     | 0.183                      |

**Table S2.** Top 56 peptide ions discriminate CLM and CFI group. CLM - colorectal cancer liver metastasis; CFI - cancer free individuals and healthy participants.

| <i>m/z</i> | Interval width (±Da) |
|------------|----------------------|------------|----------------------|------------|----------------------|------------|----------------------|
| 453.9      | 4.860                | 524.16     | 0.014                | 1660.48    | 0.877                | 929.36     | 166.434              |
| 458.35     | 4.014                | 527.72     | 7.099                | 1661.47    | 0.929                | 1012.59    | 0.007                |
| 469.36     | 17.993               | 560.7      | 58.850               | 1661.99    | 0.059                | 1012.6     | 0.004                |
| 478.36     | 0.001                | 604.12     | 27.982               | 1671.95    | 19.857               | 1013.1     | 0.958                |
| 482.83     | 8.926                | 618.12     | 0.002                | 1681.91    | 0.007                | 1034.87    | 42.556               |
| 491.84     | 9.054                | 621.12     | 5.981                | 1681.92    | 0.052                | 1347.06    | 581.802              |
| 496.37     | 0.016                | 629.11     | 9.935                | 1715.44    | 66.992               | 1637.99    | 0.009                |
| 496.86     | 0.963                | 634.09     | 0.001                | 1749.47    | 0.960                | 1638       | 0.050                |
| 503.32     | 11.932               | 637.09     | 6.003                | 1750.01    | 0.050                | 1638.49    | 0.927                |
| 509.79     | 0.987                | 640.11     | 0.018                | 1760.48    | 20.921               | 1639.49    | 0.939                |
| 510.3      | 0.002                | 640.61     | 0.976                | 1770.98    | 0.083                | 1640       | 0.050                |
| 514.33     | 8.046                | 732.12     | 182.016              | 1815.02    | 87.991               | 1649.96    | 19.876               |
| 518.36     | 0.003                | 826.14     | 5.995                | 1879.54    | 41.036               | 1659.92    | 0.074                |
| 521.26     | 5.786                | 837.64     | 16.972               | 1900.56    | 0.977                | 1660       | 0.020                |

**Table S3.** Top 4 discriminative ions identified by NIMS-FT-ICR-MS were applied in the Mascot peptide mass fingerprint for protein matching. We identified the top-five potential protein signatures that can differentiate CRC and CFI group. CRC - colorectal cancer stage-I to stage-IV; CFI - cancer free individuals and healthy participants; NIMS-FT-ICR-MS - Nanostructure-initiator mass spectrometry - Fourier-transform ion cyclotron resonance mass spectrometry.

| Uniprot Accession | Mass                                                                                                                                                                                                                       | Score | Observed ( <i>m/z</i> ) | MASCOT Calculated and Mass Tolerance | Peptide Sequence Match (start to end) |
|-------------------|----------------------------------------------------------------------------------------------------------------------------------------------------------------------------------------------------------------------------|-------|-------------------------|--------------------------------------|---------------------------------------|
| E5RHQ2            | 3539                                                                                                                                                                                                                       | 18    | 3408.4300               | 3407.5001 and -22.71 ppm             | 2 to 33                               |
|                   | <i>Sequence matched:</i> M.AGAGGGNDIQWCFSQVKGAVDDDVAEDHLFET.-<br><i>Identified protein:</i> Serine/threonine-protein phosphatase 2A 55 kDa regulatory subunit B alpha isoform OS=Homo sapiens OX=9606 GN=PPP2R2A PE=1 SV=1 |       |                         |                                      |                                       |
| D6RF68            | 2821                                                                                                                                                                                                                       | 15    | 2691.4700               | 2690.4869 and -9 ppm                 | 2 to 23                               |
|                   | <i>Sequence matched:</i> M.TSIFHFAIFMLILQIRIQLSE.- + Acetyl (Protein N-term); Oxidation (M)<br><i>Identified protein:</i> Toll-like receptor 1 (Fragment) OS=Homo sapiens OX=9606 GN=TLR1 PE=4 SV=1                        |       |                         |                                      |                                       |
| D6RBG6            | 5542                                                                                                                                                                                                                       | 15    | 3582.6300               | 3581.6086 and 3.96 ppm               | 1 to 30                               |

|        |                                                                                                                                                                                                        |    |           |                          |           |
|--------|--------------------------------------------------------------------------------------------------------------------------------------------------------------------------------------------------------|----|-----------|--------------------------|-----------|
|        | <i>Sequence matched:</i> -.MDLTGIESMDQCRHTLEQHNWNIEAAVQDR.L + Acetyl<br>(Protein N-term)<br><i>Identified protein:</i> FAS-associated factor 2 (Fragment) OS=Homo sapiens OX=9606<br>GN=FAF2 PE=1 SV=1 |    |           |                          |           |
| H3BR52 | 13975                                                                                                                                                                                                  | 13 | 3792.1300 | 3791.2038<br>and -21 ppm | 91 to 128 |
|        | <i>Sequence matched:</i> R.AVLHLLLSVPAGFLLATILGTACLAIASGIYLLVSGAL.-<br><i>Identified protein:</i> Cytochrome b(558) alpha chain OS=Homo sapiens OX=9606<br>GN=CYBA PE=1 SV=1                           |    |           |                          |           |

**Table S4.** Top 4 discriminative ions identified by NIMS-FT-ICR-MS were applied in the Mascot peptide mass fingerprint for the protein match. We identified top-five potential protein signatures that can differentiate CLM and CFI group. CLM - colorectal cancer liver metastasis; CFI - cancer free individuals and healthy participants; NIMS-FT-ICR-MS - Nanostructure-initiator mass spectrometry - Fourier-transform ion cyclotron resonance mass spectrometry.

| Uniprot Accession | Mass                                                                                                                                                                                                                          | Score | Observed (m/z) | MASCOT Calculated and mass tolerance | Peptide Sequence Match (start to end) |
|-------------------|-------------------------------------------------------------------------------------------------------------------------------------------------------------------------------------------------------------------------------|-------|----------------|--------------------------------------|---------------------------------------|
| F2Z356            | 15548                                                                                                                                                                                                                         | 19    | (a) 3822.0500  | 1769.9709 and 2.50 ppm               | 85 to 119                             |
|                   |                                                                                                                                                                                                                               |       | (b) 1770.9800  | 1769.9709 and 1.01 ppm               | 107 to 123                            |
|                   | Sequence matched (a): R.SIAVLELICDVHNPGQDLVIHRTSVPAPLNSCLLK.V<br>Sequence matched (b): R.TSVPAPLNSCLLKVGSK.T<br>Identified protein: General transcription factor 3C polypeptide 4 OS=Homo sapiens OX=9606 GN=GTF3C4 PE=1 SV=1 |       |                |                                      |                                       |
|                   |                                                                                                                                                                                                                               |       |                |                                      |                                       |
| X6RKG5            | 11905                                                                                                                                                                                                                         | 16    | (a) 1671.9500  | 1670.9063 and 21.8 ppm               | 49 to 64                              |
|                   |                                                                                                                                                                                                                               |       | (b) 2391.2900  | 2390.2827 and 7.80 ppm               | 87 to 106                             |
|                   | Sequence matched (a): R.ARLQGSATAAEASLLR.R<br>Sequence matched (b): R.SSRALRPASMDLLRPHWLEV.-<br>Identified protein: Lck-interacting transmembrane adapter 1 (Fragment) OS=Homo sapiens OX=9606 GN=LIME1 PE=4 SV=7             |       |                |                                      |                                       |
|                   |                                                                                                                                                                                                                               |       |                |                                      |                                       |
| S4R3D0            | 7403                                                                                                                                                                                                                          | 15    | 3822.0500      | 3821.0801 and -9.78 ppm              | 2 to 37                               |
|                   | Sequence matched: M.ESSGTPSVTLIVGSGLSCLALITLAVVYAALWRYIR.S + Acetyl (Protein N-term)<br>Identified protein: Adhesion G protein-coupled receptor B3 (Fragment) OS=Homo sapiens OX=9606 GN=ADGRB3 PE=4 SV=1                     |       |                |                                      |                                       |
| F8WCL0            | 6018                                                                                                                                                                                                                          | 14    | 3822.0500      | 3821.0067 and 9.44 ppm               | 2 to 37                               |
|                   | Sequence matched: M.MPTPVILLKEGTDSSQGIPQLVSNISACQVIAEAVR.T<br>Identified protein: T-complex protein 1 subunit eta OS=Homo sapiens OX=9606 GN=CCT7 PE=1 SV=1                                                                   |       |                |                                      |                                       |

**Table S5.** Top discriminative ions were identified by DIOS-FT-ICR-MS, which was applied in the LipidMaps database for annotation. We identified a profile of lithiated-lipids that can differentiate CRC from the CFI group. CRC - colorectal cancer stage-I to stage-IV; CFI - cancer free individuals and healthy participants; DIOS-FT-ICR-MS - desorption/ionisation on porous silicon fourier-transform ion cyclotron resonance mass spectrometry. LPE – lysophosphatidylethanolamine, Cer – Ceramide, NAE - N-acylethanolamines, CerP - Ceramide 1-phosphates, LPS – lysophosphatidylserine, PC – phosphatidylcholine, PS – phosphatidylserine, LPC – lysophosphatidylcholine, SM – sphingomyelin, PE – phosphatidylethanolamine, DG – diacylglycerol, PG – phosphatidylglycerol, LPG – lysophosphatidylglycerol, LPI –lysophosphatidylionisitol, TG- triacylglycerol.

| Input Mass | Matched Mass in Lipid Maps | Delta (Da) | Putative Lipids | Formula       | Ion     |
|------------|----------------------------|------------|-----------------|---------------|---------|
| 496.340    | 496.337                    | 0.0026     | LPE O-20:3      | C25H48NO6PLi  | [M+Li]+ |
| 526.517    | 526.517                    | 0          | Cer 34:2;O      | C34H65NO2Li   | [M+Li]+ |
| 526.517    | 526.517                    | 0          | NAE 32:2        | C34H65NO2Li   | [M+Li]+ |
| 636.627    | 636.626                    | 0.0005     | Cer 42:3;O      | C42H79NO2Li   | [M+Li]+ |
| 640.416    | 640.416                    | 0          | CerP 32:3;O5    | C32H60NO9PLi  | [M+Li]+ |
| 640.416    | 640.416                    | 0          | LPS 26:2        | C32H60NO9PLi  | [M+Li]+ |
| 640.416    | 640.416                    | 0          | LPS O-26:3;O    | C32H60NO9PLi  | [M+Li]+ |
| 640.416    | 640.416                    | 0          | PC 24:2;O       | C32H60NO9PLi  | [M+Li]+ |
| 640.416    | 640.416                    | 0          | PS O-26:2       | C32H60NO9PLi  | [M+Li]+ |
| 650.510    | 650.509                    | 0.0005     | CerP 36:2;O2    | C36H70NO6PLi  | [M+Li]+ |
| 650.510    | 650.509                    | 0.0005     | LPC O-28:3      | C36H70NO6PLi  | [M+Li]+ |
| 678.540    | 678.540                    | 0.0008     | CerP 38:2;O2    | C38H74NO6PLi  | [M+Li]+ |
| 678.540    | 678.540                    | 0.0008     | LPC O-30:3      | C38H74NO6PLi  | [M+Li]+ |
| 735.595    | 735.598                    | 0.0037     | SM 36:2;O2      | C41H81N2O6PLi | [M+Li]+ |
| 737.614    | 737.614                    | 0.0003     | SM 36:1;O2      | C41H83N2O6PLi | [M+Li]+ |
| 758.570    | 758.567                    | 0.003      | PE O-38:5       | C43H78NO7PLi  | [M+Li]+ |
| 758.603    | 758.603                    | 0.0004     | CerP 44:4;O2    | C44H82NO6PLi  | [M+Li]+ |
| 759.574    | 759.574                    | 0.0006     | DG 44:8;O2      | C47H76O7Li    | [M+Li]+ |
| 759.574    | 759.572                    | 0.0018     | LPG 34:0;O      | C40H81O10PLi  | [M+Li]+ |
| 759.574    | 759.572                    | 0.0018     | PG O-34:0;O     | C40H81O10PLi  | [M+Li]+ |
| 759.574    | 759.574                    | 0.0006     | TG 44:7;O       | C47H76O7Li    | [M+Li]+ |
| 759.574    | 759.574                    | 0.0006     | TG O-44:8;O2    | C47H76O7Li    | [M+Li]+ |
| 760.619    | 760.619                    | 0.0001     | CerP 44:3;O2    | C44H84NO6PLi  | [M+Li]+ |
| 763.634    | 763.630                    | 0.004      | SM 38:2;O2      | C43H85N2O6PLi | [M+Li]+ |
| 765.645    | 765.645                    | 0.0006     | SM 38:1;O2      | C43H87N2O6PLi | [M+Li]+ |
| 781.536    | 781.535                    | 0.0006     | PA 42:7         | C45H75O8PLi   | [M+Li]+ |
| 781.536    | 781.535                    | 0.0006     | PA O-42:8;O     | C45H75O8PLi   | [M+Li]+ |
| 782.571    | 782.567                    | 0.004      | PE O-40:7       | C45H78NO7PLi  | [M+Li]+ |
| 786.602    | 786.598                    | 0.0037     | PE O-40:5       | C45H82NO7PLi  | [M+Li]+ |
| 788.578    | 788.577                    | 0.0004     | CerP 44:5;O4    | C44H80NO8PLi  | [M+Li]+ |
| 788.578    | 788.577                    | 0.0004     | PC 36:4         | C44H80NO8PLi  | [M+Li]+ |
| 788.578    | 788.577                    | 0.0004     | PC O-36:5;O     | C44H80NO8PLi  | [M+Li]+ |
| 789.580    | 789.582                    | 0.0028     | LPI O-32:0      | C41H83O11PLi  | [M+Li]+ |
| 802.592    | 802.593                    | 0.0013     | PE 40:4         | C45H82NO8PLi  | [M+Li]+ |

|         |         |        |              |               |         |
|---------|---------|--------|--------------|---------------|---------|
| 802.592 | 802.593 | 0.0013 | PE O-40:5;O  | C45H82NO8PLi  | [M+Li]+ |
| 812.578 | 812.577 | 0.0004 | PC 38:6      | C46H80NO8PLi  | [M+Li]+ |
| 812.578 | 812.577 | 0.0004 | PC O-38:7;O  | C46H80NO8PLi  | [M+Li]+ |
| 816.609 | 816.608 | 0.0001 | CerP 46:5;O4 | C46H84NO8PLi  | [M+Li]+ |
| 816.609 | 816.608 | 0.0001 | PC 38:4      | C46H84NO8PLi  | [M+Li]+ |
| 816.609 | 816.608 | 0.0001 | PC O-38:5;O  | C46H84NO8PLi  | [M+Li]+ |
| 817.613 | 817.614 | 0.0011 | LPI O-34:0   | C43H87O11PLi  | [M+Li]+ |
| 817.677 | 817.676 | 0.0001 | SM 42:3;O2   | C47H91N2O6PLi | [M+Li]+ |
| 819.693 | 819.692 | 0.0004 | SM 42:2;O2   | C47H93N2O6PLi | [M+Li]+ |
| 838.593 | 838.593 | 0.0003 | PC 40:7      | C48H82NO8PLi  | [M+Li]+ |
| 838.593 | 838.593 | 0.0003 | PC O-40:8;O  | C48H82NO8PLi  | [M+Li]+ |
| 840.608 | 840.608 | 0.0009 | PC 40:6      | C48H84NO8PLi  | [M+Li]+ |
| 840.608 | 840.608 | 0.0009 | PC O-40:7;O  | C48H84NO8PLi  | [M+Li]+ |

**Table S6.** DIOS-FT-ICR-MS identified top discriminative ions, annotated using LipidMaps. We identified a profile of lithiated-lipids that can differentiate CLM and CFI group. CLM - colorectal cancer liver metastasis; CFI - cancer free individual and healthy participants; DIOS-FT-ICR-MS - desorption/ionisation on porous silicon fourier-transform ion cyclotron resonance mass spectrometry; PS – phosphatidylserine, PG – phosphatidylglycerol, LPG – lysophosphatidylglycerol , PI – phosphatidylinositol, TG- triacylglycerol, CL – cholesterol, PA - phosphatidicacid

| Input Mass | Matched Mass in Lipid Maps | Delta (Da) | Putative Lipids | Formula        | Ion     |
|------------|----------------------------|------------|-----------------|----------------|---------|
| 639.377    | 639.384                    | 0.0074     | LPG 26:4;O      | C32H57O10PLi   | [M+Li]+ |
| 639.377    | 639.384                    | 0.0074     | PG 26:3         | C32H57O10PLi   | [M+Li]+ |
| 639.377    | 639.384                    | 0.0074     | PG O-26:4;O     | C32H57O10PLi   | [M+Li]+ |
| 711.435    | 711.441                    | 0.0069     | PG 30:3;O       | C36H65O11PLi   | [M+Li]+ |
| 711.435    | 711.444                    | 0.0093     | TG 40:11;O2     | C43H60O8Li     | [M+Li]+ |
| 753.445    | 753.454                    | 0.0098     | TG 42:12;O3     | C45H62O9Li     | [M+Li]+ |
| 771.456    | 771.457                    | 0.0012     | PA 42:12        | C45H65O8PLi    | [M+Li]+ |
| 843.513    | 843.514                    | 0.0017     | PA 46:12;O      | C49H73O9PLi    | [M+Li]+ |
| 932.571    | 932.562                    | 0.0086     | PS 46:11;O      | C52H80NO11PLi  | [M+Li]+ |
| 991.593    | 991.588                    | 0.0048     | PI 46:11        | C55H85O13PLi   | [M+Li]+ |
| 991.593    | 991.588                    | 0.0048     | PI O-46:12;O    | C55H85O13PLi   | [M+Li]+ |
| 1017.600   | 1017.604                   | 0.0039     | PI 48:12        | C57H87O13PLi   | [M+Li]+ |
| 1035.610   | 1035.614                   | 0.0044     | PI 48:11;O      | C57H89O14PLi   | [M+Li]+ |
| 1387.832   | 1387.831                   | 0.0012     | CL 68:14        | C77H122O17P2Li | [M+Li]+ |
| 1415.861   | 1415.863                   | 0.0025     | CL 70:14        | C79H126O17P2Li | [M+Li]+ |
